# Supplementary material for: The protein environment restricts the intramolecular charge transfer character of the luciferine/luciferase complex
Source: Royal Society of Chemistry journal article supplement (doi:10.1039/d3cp01387a), 2023-01-01
Supplement: d3cp01387a1.pdf [file d3cp01387a1.pdf]

## SUPPORTING INFORMATION

---

# THE PROTEIN ENVIRONMENT RESTRICTS THE INTRAMOLECULAR CHARGE TRANSFER CHARACTER OF THE LUCIFERINE/LUCIFERASE COMPLEX

---

Henar Mateo-delaFuente,<sup>a</sup> Davide Avagliano,<sup>b</sup> Marco Garavelli<sup>b</sup> and Juan J. Nogueira<sup>a,c</sup>

<sup>a</sup> Chemistry Department, Universidad Autónoma de Madrid, 28049 Madrid, Spain.

<sup>b</sup> Dipartimento di Chimica industriale "Toso Montanari", Università di Bologna, 40136 Bologna, Italy. E-mail: marco.garavelli@unibo.it

<sup>c</sup> Institute for Advanced Research in Chemical Sciences (IAdChem), Universidad Autónoma de Madrid, 28049 Madrid, Spain. E-mail:juan.nogueira@uam.es

## 1 Oxyluciferin Parameters for the Classical Molecular Dynamics Simulations

### 1.1 Atom Types and Charges

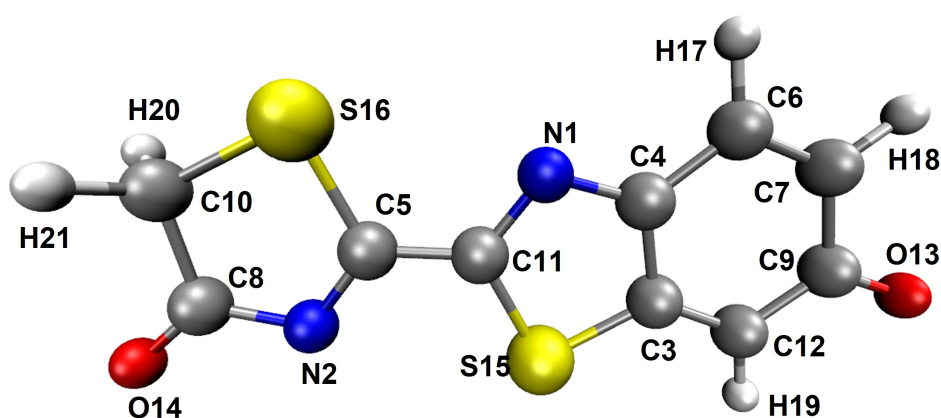

Figure S1: Structure of the OLU with its atoms labeled.

| Atom | Atom type | Charge         |                |
|------|-----------|----------------|----------------|
|      |           | S <sub>0</sub> | S <sub>1</sub> |
| N1   | NC        | -0.318749      | -0.507990      |
| N2   | NE        | -0.323092      | -0.522480      |
| C3   | CA        | -0.187395      | 0.138902       |
| C4   | CA        | 0.194161       | 0.238767       |
| C5   | CF        | -0.004360      | 0.171311       |
| C6   | CA        | -0.178360      | -0.235721      |
| C7   | CA        | -0.301687      | -0.432107      |
| C8   | C         | 0.335751       | 0.644779       |
| C9   | CA        | 0.281274       | 0.600080       |
| C10  | C3        | -0.682846      | 0.032659       |
| C11  | CD        | -0.007420      | 0.258466       |
| C12  | CA        | -0.347720      | -0.405953      |
| O13  | O         | -0.445425      | -0.618213      |
| O14  | O         | -0.355803      | -0.608688      |
| S15  | SS        | 0.207947       | -0.084461      |
| S16  | SS        | 0.141643       | -0.254811      |
| H17  | HA        | 0.173894       | 0.162641       |
| H18  | HA        | 0.162581       | 0.157964       |
| H19  | HA        | 0.166778       | 0.197981       |
| H20  | H1        | 0.244164       | 0.033211       |
| H21  | H1        | 0.244665       | 0.033664       |

Table S1: Atom types and charges of the OLU chomophore as represented in Figure S1.

## 1.2 Stretching

Taking into account the Hamiltonian description of the Amber FF, then the stretching term is described by:

$$E^{stretching} = \sum_{bonds} k_b (r - r_0)^2 \quad (1)$$

where  $k_b$  and  $r_0$  represent the stretching force constant in kcal/mol and the bond length in Å, respectively.

| Stretching | S <sub>0</sub>       |                      | S <sub>1</sub>       |                      |
|------------|----------------------|----------------------|----------------------|----------------------|
|            | <i>k<sub>b</sub></i> | <i>r<sub>0</sub></i> | <i>k<sub>b</sub></i> | <i>r<sub>0</sub></i> |
| NC-CA      | 377.701              | 1.340                | 236.501              | 1.380                |
| NC-CD      | 416.221              | 1.319                | 324.665              | 1.323                |
| NE-CF      | 458.539              | 1.309                | 406.144              | 1.320                |
| NE-C       | 294.500              | 1.379                | 313.284              | 1.367                |
| CA-CA      | 256.038              | 1.439                | 277.658              | 1.412                |
| CA-CA      | 451.744              | 1.370                | 357.402              | 1.384                |
| CA-SS      | 158.716              | 1.756                | 95.295               | 1.754                |
| CA-CA      | 341.153              | 1.420                | 342.363              | 1.414                |
| CF-CD      | 334.443              | 1.412                | 252.306              | 1.425                |
| CF-SS      | 119.431              | 1.786                | 120.216              | 1.782                |
| CA-CA      | 495.168              | 1.359                | 444.964              | 1.374                |
| CA-HA      | 376.657              | 1.084                | 373.389              | 1.085                |
| CA-CA      | 241.339              | 1.465                | 226.137              | 1.449                |
| CA-HA      | 375.522              | 1.085                | 377.921              | 1.084                |
| C -C3      | 140.708              | 1.540                | 131.071              | 1.544                |
| C -O       | 746.684              | 1.218                | 697.688              | 1.228                |
| CA-CA      | 301.545              | 1.443                | 256.391              | 1.457                |
| CA-O       | 585.278              | 1.255                | 553.729              | 1.257                |
| C3-SS      | 141.318              | 1.819                | 135.249              | 1.823                |
| C3-H1      | 359.823              | 1.090                | 355.135              | 1.091                |
| C3-H1      | 363.312              | 1.088                | 357.178              | 1.090                |
| CD-SS      | 126.329              | 1.784                | 115.780              | 1.770                |
| CA-HA      | 378.966              | 1.083                | 385.174              | 1.082                |

Table S2: Stretching parameters for the OLU chromophore. Force constants appear in kcal/mol and bond lengths in Å.

### 1.3 Bending

In the case of the bending, the Hamiltonian term is described by:

$$E^{bending} = \sum_{angles} k_{\theta}(\theta - \theta_0)^2 \quad (2)$$

where  $k_{\theta}$  and  $\theta_0$  represent the bending force constant in kcal/mol/radian<sup>2</sup> and the equilibrium angle in degrees, respectively.

| Bending  | S <sub>0</sub>        |                | S <sub>1</sub>        |                |
|----------|-----------------------|----------------|-----------------------|----------------|
|          | <i>k</i> <sub>θ</sub> | θ <sub>0</sub> | <i>k</i> <sub>θ</sub> | θ <sub>0</sub> |
| NC-CA-CA | 127.744               | 116.106        | 135.009               | 115.517        |
| NC-CA-CA | 136.731               | 125.480        | 160.500               | 125.852        |
| NC-CD-CF | 90.143                | 123.975        | 94.941                | 125.092        |
| NC-CD-SS | 87.079                | 114.374        | 70.479                | 115.698        |
| NE-CF-CD | 111.777               | 123.523        | 111.352               | 123.935        |
| NE-CF-SS | 98.118                | 117.523        | 89.791                | 117.373        |
| NE-C -C3 | 102.894               | 113.937        | 105.649               | 113.807        |
| NE-C -O  | 107.507               | 124.563        | 112.087               | 125.332        |
| CA-CA-CA | 168.666               | 118.414        | 161.108               | 118.632        |
| CA-CA-CA | 139.873               | 119.977        | 144.296               | 119.773        |
| CA-CA-HA | 57.373                | 122.115        | 57.161                | 122.396        |
| CA-SS-CD | 142.809               | 88.849         | 148.032               | 88.348         |
| CA-NC-CD | 125.552               | 112.442        | 110.362               | 110.685        |
| CA-CA-CA | 148.626               | 122.435        | 131.358               | 122.426        |
| CA-CA-SS | 135.996               | 108.229        | 102.784               | 109.753        |
| CA-CA-CA | 150.852               | 119.751        | 149.373               | 120.570        |
| CA-CA-HA | 62.076                | 118.682        | 61.577                | 118.572        |
| CF-NE-C  | 134.402               | 113.139        | 142.658               | 113.465        |
| CF-CD-SS | 111.565               | 121.651        | 83.053                | 119.210        |
| CF-SS-C3 | 120.223               | 88.975         | 121.190               | 88.847         |
| CA-CA-CA | 168.734               | 123.061        | 160.130               | 122.228        |
| CA-CA-HA | 63.359                | 120.856        | 62.997                | 120.875        |
| CA-CA-HA | 64.218                | 121.567        | 64.158                | 120.858        |
| CA-CA-CA | 217.531               | 116.362        | 217.730               | 116.369        |
| CA-CA-O  | 124.901               | 121.167        | 122.433               | 122.962        |
| C -C3-SS | 118.433               | 106.426        | 118.662               | 106.507        |
| C -C3-H1 | 66.861                | 109.886        | 66.983                | 110.297        |
| C -C3-H1 | 66.273                | 109.991        | 66.502                | 110.372        |
| CA-CA-HA | 63.480                | 116.083        | 60.755                | 116.897        |
| CA-CA-HA | 60.999                | 117.908        | 62.987                | 117.830        |
| C3-C -O  | 92.922                | 121.500        | 91.674                | 120.861        |
| CD-CF-SS | 117.039               | 118.955        | 111.526               | 118.692        |
| CA-CA-SS | 145.301               | 129.335        | 121.419               | 127.821        |
| CA-CA-O  | 123.460               | 122.471        | 114.548               | 120.669        |
| SS-C3-H1 | 48.855                | 110.727        | 46.200                | 110.534        |
| SS-C3-H1 | 48.100                | 110.794        | 45.677                | 110.544        |
| H1-C3-H1 | 34.684                | 108.994        | 33.747                | 108.587        |

Table S3: Bending parameters for the OLU chomophore. Force constants appear in kcal/mol/radian<sup>2</sup> and equilibrium angles in degrees.

## 1.4 Torsion

Torsion movements, both proper and improper are included in the Hamiltonian term by:

$$E^{dihedral} = \sum_{dihedrals} V_n(1 + \cos(n\phi - \gamma)) \quad (3)$$

where  $V_n$  represents the torsion barrier term (in kcal/mol);  $\gamma$ , the phase (degrees) and  $n$ , the periodicity. Additionally, Amber20 employs a divider term that splits the torsion term into individual contributions for each pair of atoms involved in the torsion.

| Dihedral    | S <sub>0</sub> |                |         |        | S <sub>1</sub> |                |         |        |
|-------------|----------------|----------------|---------|--------|----------------|----------------|---------|--------|
|             | Divider        | V <sub>n</sub> | γ       | n      | Divider        | V <sub>n</sub> | γ       | n      |
| CA-CA-CA-NC | 4              | 14.500         | 180.000 | 2.000  | 4              | 14.500         | 180.000 | 2.000  |
| HA-CA-CA-NC | 4              | 14.500         | 180.000 | 2.000  | 4              | 14.500         | 180.000 | 2.000  |
| NC-CD-SS-CA | 2              | 2.200          | 180.000 | 2.000  | 2              | 2.200          | 180.000 | 2.000  |
| NC-CD-CF-NE | 4              | 4.000          | 180.000 | 2.000  | 4              | 4.000          | 180.000 | 2.000  |
| SS-CD-CF-NE | 4              | 4.000          | 180.000 | 2.000  | 4              | 4.000          | 180.000 | 2.000  |
| NE-CF-SS-C3 | 2              | 2.200          | 180.000 | 2.000  | 2              | 2.200          | 180.000 | 2.000  |
| NE-C -C3-SS | 6              | 0.000          | 180.000 | 2.000  | 6              | 0.000          | 180.000 | 2.000  |
| NE-C -C3-H1 | 6              | 0.000          | 180.000 | 2.000  | 6              | 0.000          | 180.000 | 2.000  |
| CA-CA-CA-CA | 4              | 14.500         | 180.000 | 2.000  | 4              | 14.500         | 180.000 | 2.000  |
| CA-CA-CA-HA | 4              | 14.500         | 180.000 | 2.000  | 4              | 14.500         | 180.000 | 2.000  |
| CF-CD-NC-CA | 2              | 9.500          | 180.000 | 2.000  | 2              | 9.500          | 180.000 | 2.000  |
| SS-CD-NC-CA | 2              | 9.500          | 180.000 | 2.000  | 2              | 9.500          | 180.000 | 2.000  |
| CA-CA-SS-CD | 2              | 0.800          | 180.000 | 2.000  | 2              | 0.800          | 180.000 | 2.000  |
| C3-C -NE-CF | 2              | 0.400          | 180.000 | 2.000  | 2              | 0.400          | 180.000 | 2.000  |
| O -C -NE-CF | 2              | 0.400          | 180.000 | 2.000  | 2              | 0.400          | 180.000 | 2.000  |
| CF-CD-SS-CA | 2              | 2.200          | 180.000 | 2.000  | 2              | 2.200          | 180.000 | 2.000  |
| CA-CA-CA-O  | 4              | 14.500         | 180.000 | 2.000  | 4              | 14.500         | 180.000 | 2.000  |
| CD-CF-NE-C  | 2              | 1.600          | 180.000 | 2.000  | 2              | 1.600          | 180.000 | 2.000  |
| SS-CF-NE-C  | 2              | 1.600          | 180.000 | 2.000  | 2              | 1.600          | 180.000 | 2.000  |
| C -C3-SS-CF | 3              | 1.000          | 0.000   | 3.000  | 3              | 1.000          | 0.000   | 3.000  |
| CA-CA-NC-CD | 2              | 9.600          | 180.000 | 2.000  | 2              | 9.600          | 180.000 | 2.000  |
| CD-CF-SS-C3 | 1              | 1.100          | 180.000 | -2.000 | 1              | 1.100          | 180.000 | -2.000 |
| CD-CF-SS-C3 | 1              | 0.700          | 180.000 | 3.000  | 1              | 0.700          | 180.000 | 3.000  |
| HA-CA-CA-O  | 4              | 14.500         | 180.000 | 2.000  | 4              | 14.500         | 180.000 | 2.000  |
| O -C -C3-SS | 6              | 0.000          | 180.000 | 2.000  | 6              | 0.000          | 180.000 | 2.000  |
| O -C -C3-H1 | 1              | 0.800          | 0.000   | -1.000 | 1              | 0.800          | 0.000   | -1.000 |
| O -C -C3-H1 | 1              | 0.000          | 0.000   | -2.000 | 1              | 0.000          | 0.000   | -2.000 |
| O -C -C3-H1 | 1              | 0.080          | 180.000 | 3.000  | 1              | 0.080          | 180.000 | 3.000  |
| NC-CA-CA-SS | 4              | 14.500         | 180.000 | 2.000  | 4              | 14.500         | 180.000 | 2.000  |
| CA-CA-CA-SS | 4              | 14.500         | 180.000 | 2.000  | 4              | 14.500         | 180.000 | 2.000  |
| HA-CA-CA-SS | 4              | 14.500         | 180.000 | 2.000  | 4              | 14.500         | 180.000 | 2.000  |
| NC-CD-CF-SS | 4              | 4.000          | 180.000 | 2.000  | 4              | 4.000          | 180.000 | 2.000  |
| SS-CD-CF-SS | 4              | 4.000          | 180.000 | 2.000  | 4              | 4.000          | 180.000 | 2.000  |
| HA-CA-CA-HA | 4              | 14.500         | 180.000 | 2.000  | 4              | 14.500         | 180.000 | 2.000  |
| H1-C3-SS-CF | 3              | 1.000          | 0.000   | 3.000  | 3              | 1.000          | 0.000   | 3.000  |

Table S4: Dihedral parameters for the OLU chomophore. Torsional barriers and dividers appear in kcal/mol and phases in degrees.

| Dihedral    | S <sub>0</sub> |       |     | S <sub>1</sub> |       |     |
|-------------|----------------|-------|-----|----------------|-------|-----|
|             | V <sub>n</sub> | γ     | n   | V <sub>n</sub> | γ     | n   |
| CA-CA-CA-SS | 1.1            | 180.0 | 2.0 | 1.1            | 180.0 | 2.0 |
| CA-CA-CA-NC | 1.1            | 180.0 | 2.0 | 1.1            | 180.0 | 2.0 |
| CD-NE-CF-SS | 1.1            | 180.0 | 2.0 | 1.1            | 180.0 | 2.0 |
| CA-CA-CA-HA | 1.1            | 180.0 | 2.0 | 1.1            | 180.0 | 2.0 |
| C3-NE-C -O  | 10.5           | 180.0 | 2.0 | 10.5           | 180.0 | 2.0 |
| CA-CA-CA-O  | 1.1            | 180.0 | 2.0 | 1.1            | 180.0 | 2.0 |
| CF-NC-CD-SS | 1.1            | 180.0 | 2.0 | 1.1            | 180.0 | 2.0 |

Table S5: Improper torsional parameters for the OLU chomophore. Torsional barriers and dividers appear in kcal/mol. The torsional barrier height is NOT divided by the divider.

## 1.5 Non-Bonding Parameters

Finally, for each pair of atoms the non bonding interaction is given by:

$$V_{ij} = \epsilon \left[ (R_{min}/r_{ij})^{12} - 2(R_{min}/r_{ij})^6 \right] \quad (4)$$

where  $\epsilon$  represents the 6-12 potential well depth in kcal/mol and  $R_{min}$ , the van der Waals radii in Å.

| Atom type | $S_0$       |            | $S_1$       |            |
|-----------|-------------|------------|-------------|------------|
|           | $R_{min}/2$ | $\epsilon$ | $R_{min}/2$ | $\epsilon$ |
| NC        | 1.8240      | 0.1700     | 1.8240      | 0.1700     |
| NE        | 1.8240      | 0.1700     | 1.8240      | 0.1700     |
| CA        | 1.9080      | 0.0860     | 1.9080      | 0.0860     |
| CF        | 1.9080      | 0.0860     | 1.9080      | 0.0860     |
| C         | 1.9080      | 0.0860     | 1.9080      | 0.0860     |
| C3        | 1.9080      | 0.1094     | 1.9080      | 0.1094     |
| CD        | 1.9080      | 0.0860     | 1.9080      | 0.0860     |
| O         | 1.6612      | 0.2100     | 1.6612      | 0.2100     |
| SS        | 2.0000      | 0.2500     | 2.0000      | 0.2500     |
| HA        | 1.4590      | 0.0150     | 1.4590      | 0.0150     |
| H1        | 1.3870      | 0.0157     | 1.3870      | 0.0157     |

Table S6: Non-bonding parameters for the OLU chromophore. van der Waals radii appear in Å and 6-12 potential well depth in kcal/mol.

## 2 Absorption and Emission Spectra from the Classical and QM/MM Trajectories and Angle Contributions.

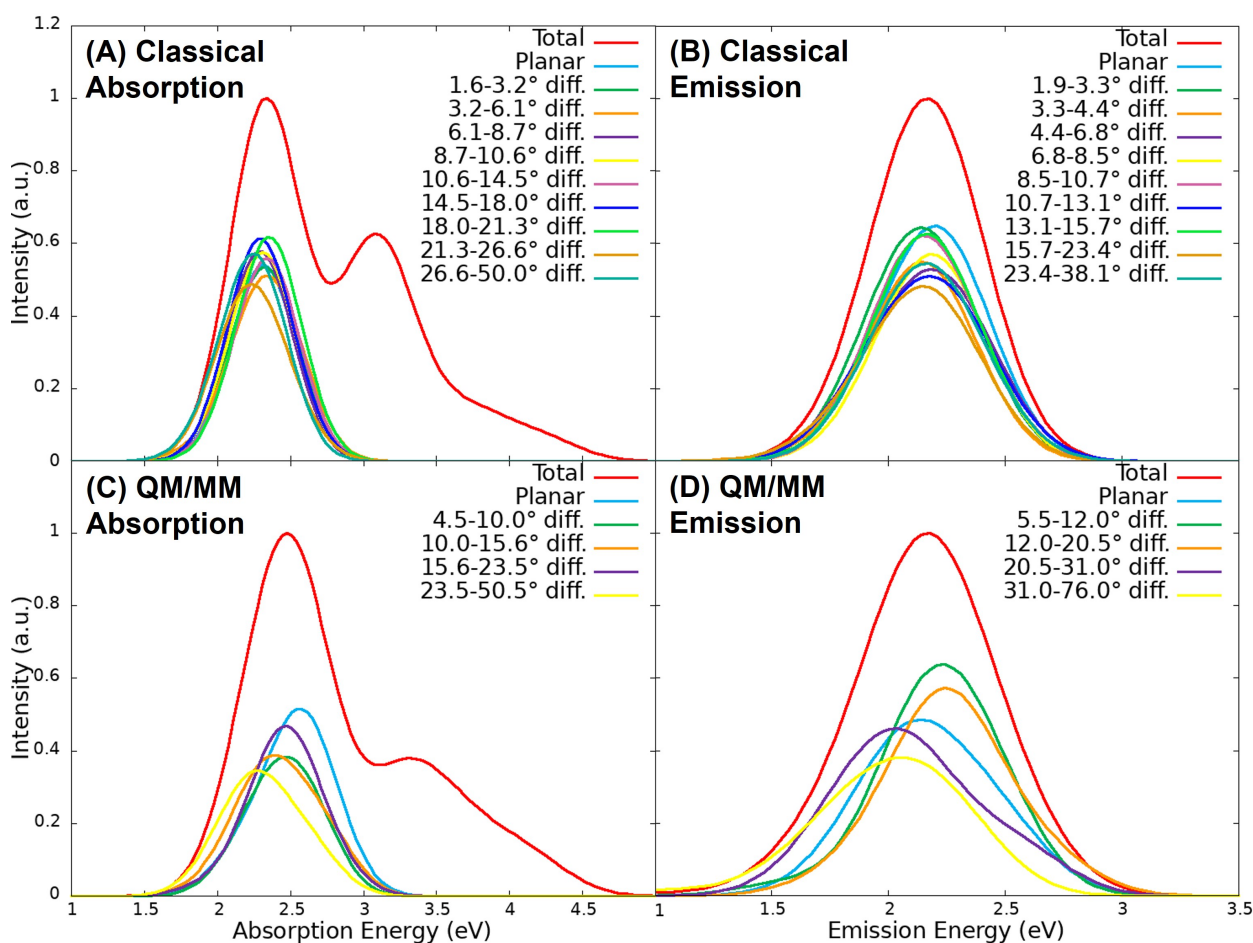

Figure S2: (A,C) Absorption and (B,D) emission spectra computed from the classical (A,B) and QM/MM (C,D) trajectories, together with their respective contributions from the  $S_0 \rightarrow S_1$  band depending on the SCCS dihedral angle.

### 3 Probability Distribution of the SCCS Dihedral Angles for the 500 ns Trajectory

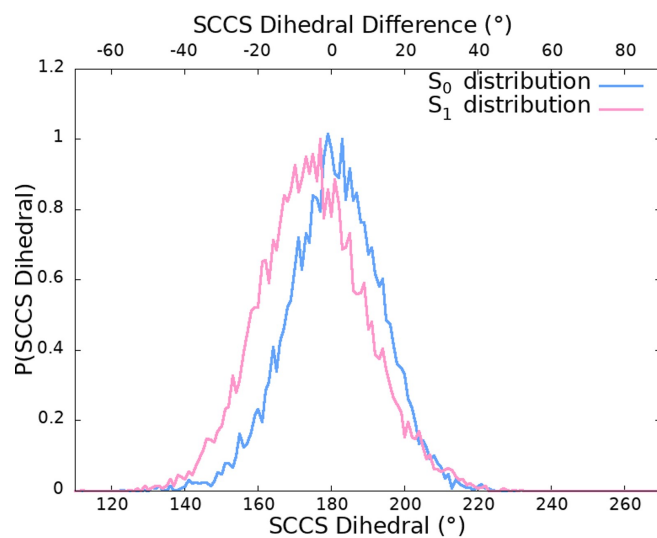

Figure S3: Probability distributions of the SCCS dihedral angles for the  $S_0$  (blue) and the  $S_1$  (pink) trajectories evolved at classical level for 500 ns.

### 4 Environment of the Two Clusters with the Smallest and Largest CT Number Values from the QM/MM Trajectory of the $S_0$ State.

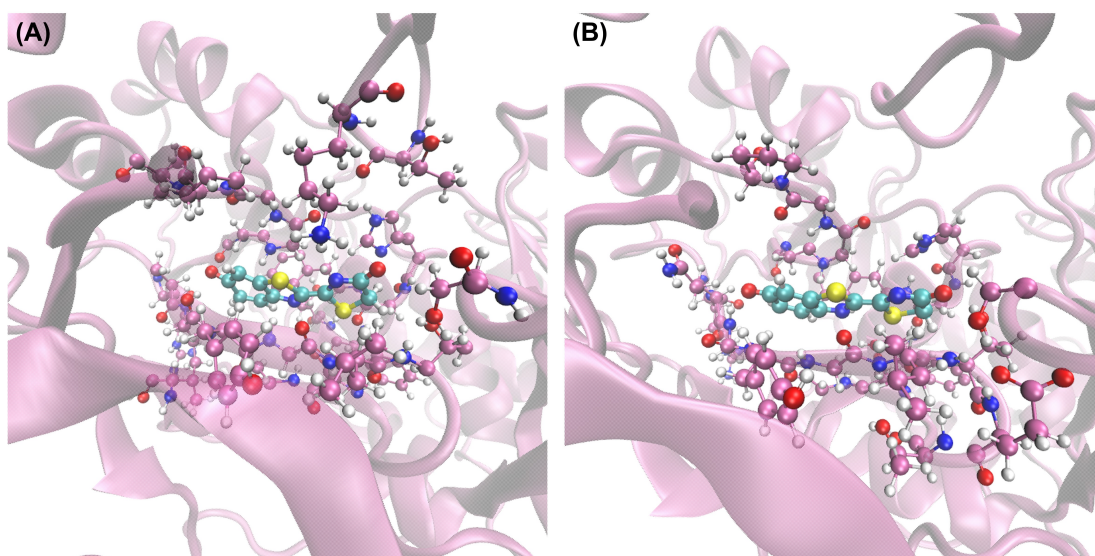

Figure S4: Representative structure with the protein environment of the two clusters with the 20 snapshots with smallest (A) and largest (B) CT number values extracted from the QM/MM trajectory of the  $S_0$  state.

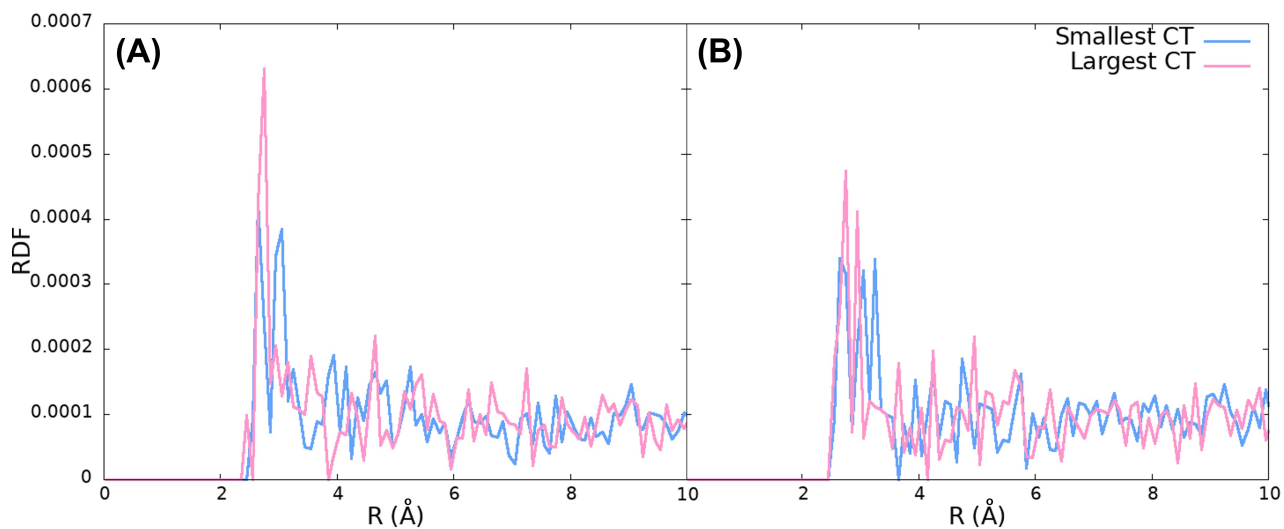

Figure S5: Radial distribution functions (RDF) between (A) the oxygen atom of the thiazole fragment and the oxygen atom of water and (B) the oxygen atom of the benzothiazole fragment and the oxygen atom of water for the two clusters with the 20 snapshots with smallest (blue) and largest (pink) CT number values extracted from the QM/MM trajectory of the  $S_0$  state.

| Cluster | $\langle CT \rangle$ | Protein       |               |               | $H_2O$        |               |               | Protein + $H_2O$ |               |               |
|---------|----------------------|---------------|---------------|---------------|---------------|---------------|---------------|------------------|---------------|---------------|
|         |                      | $O^{tz}$      | $O^{btz}$     | Total         | $O^{tz}$      | $O^{btz}$     | Total         | $O^{tz}$         | $O^{btz}$     | Total         |
| Small   | $0.45 \pm 0.06$      | $0.0 \pm 0.0$ | $0.6 \pm 1.5$ | $0.6 \pm 1.5$ | $0.1 \pm 0.3$ | $0.0 \pm 0.0$ | $0.1 \pm 0.3$ | $0.1 \pm 0.3$    | $0.6 \pm 1.5$ | $0.7 \pm 1.5$ |
| Large   | $0.66 \pm 0.06$      | $0.2 \pm 0.9$ | $0.4 \pm 1.2$ | $0.6 \pm 1.5$ | $0.2 \pm 0.4$ | $0.3 \pm 0.4$ | $0.5 \pm 0.6$ | $0.4 \pm 0.9$    | $0.7 \pm 1.4$ | $1.1 \pm 1.6$ |

Table S7: Number of H bonds between the O of the thiazole (tz) and benzothiazole fragments of the OLU and its environment.



## 5 Total Binding Free Energy per Residue of the Classical $S_1$ Trajectories Without and With AMP

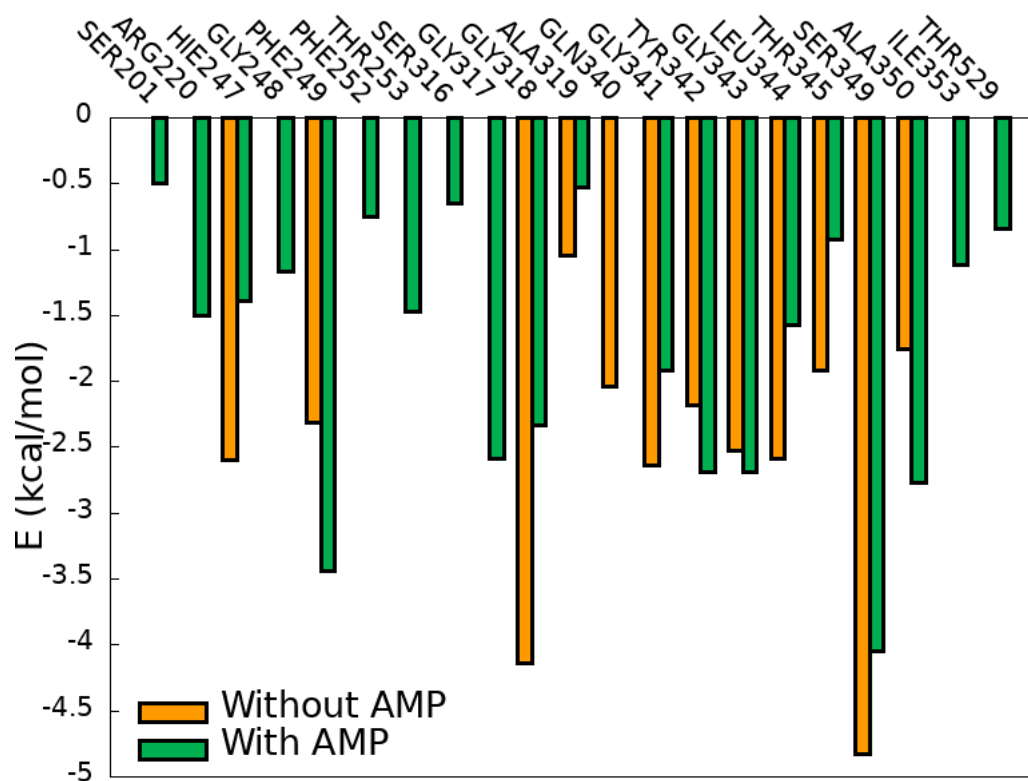

Figure S6: Total binding free energy per residue of the classical  $S_1$  trajectories without (orange) and with AMP (green) for the residues that are closer for at least 1% of the simulation time.

## 6 Representation of the Three Positions Found for the Analysed Snapshots of the $S_0$ QM/MM Trajectory

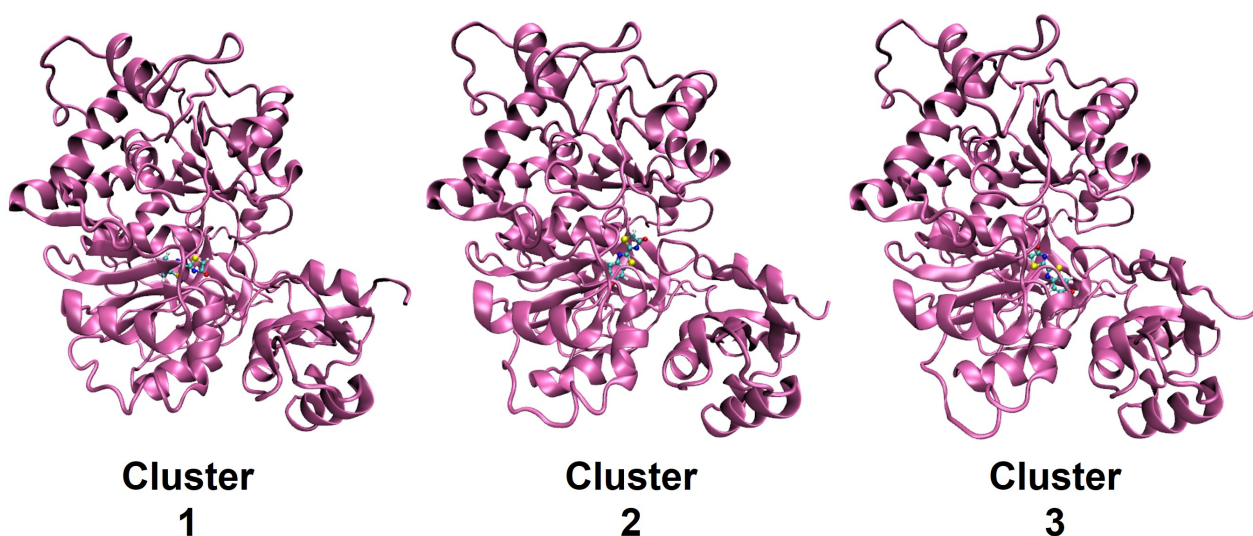

Figure S7: Representation of the three clusters of the analysed snapshots of the  $S_0$  QM/MM trajectory

## 7 Charge Transfer Number Variation with Respect to the Distance of the Closest Amino-acids of the Protein

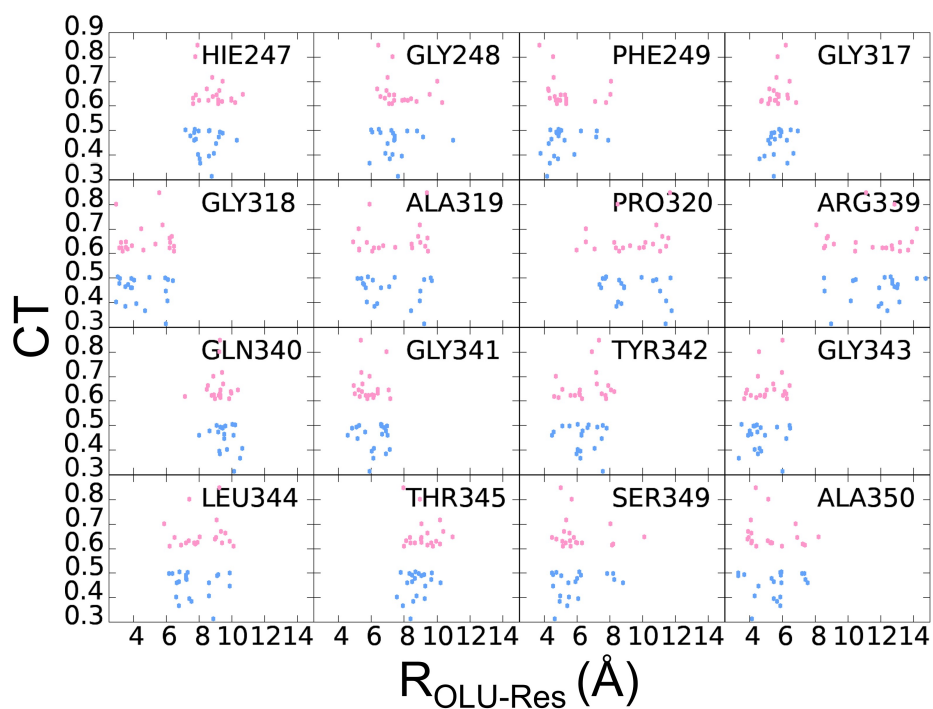

Figure S8: CT number variation with the distance between the centers of mass of the chromophore and different amino-acids for the clusters of the 20 geometries with smallest (blue) and largest (pink) CT number values
